# Supplementary material for: KPNB1 Inhibitor Importazole Reduces Ionizing Radiation-Increased Cell Surface PD-L1 Expression by Modulating Expression and Nuclear Import of IRF1
Source: MDPI journal article supplement (doi:10.3390/cimb43010013), 2021-05-19
Supplement: s1 [file s1]

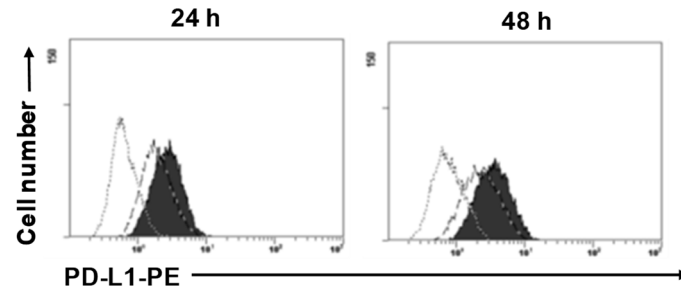

**Figure S1.** Increases in cell surface PD-L1 expression in Ca9-22 cells at 24 h and 48 h after irradiation.

Ca9-22 cells exposed to 6 Gy X-ray irradiation were cultured for 24 h and 48 h. The cells were harvested for analysis of cell surface PD-L1 expression. Representative histograms of PD-L1 expression are shown. The dotted line and broken line histograms indicate isotype control and PD-L1 expression of non-irradiated cells, respectively. The filled black histogram indicates PD-L1 expression of irradiated cells.

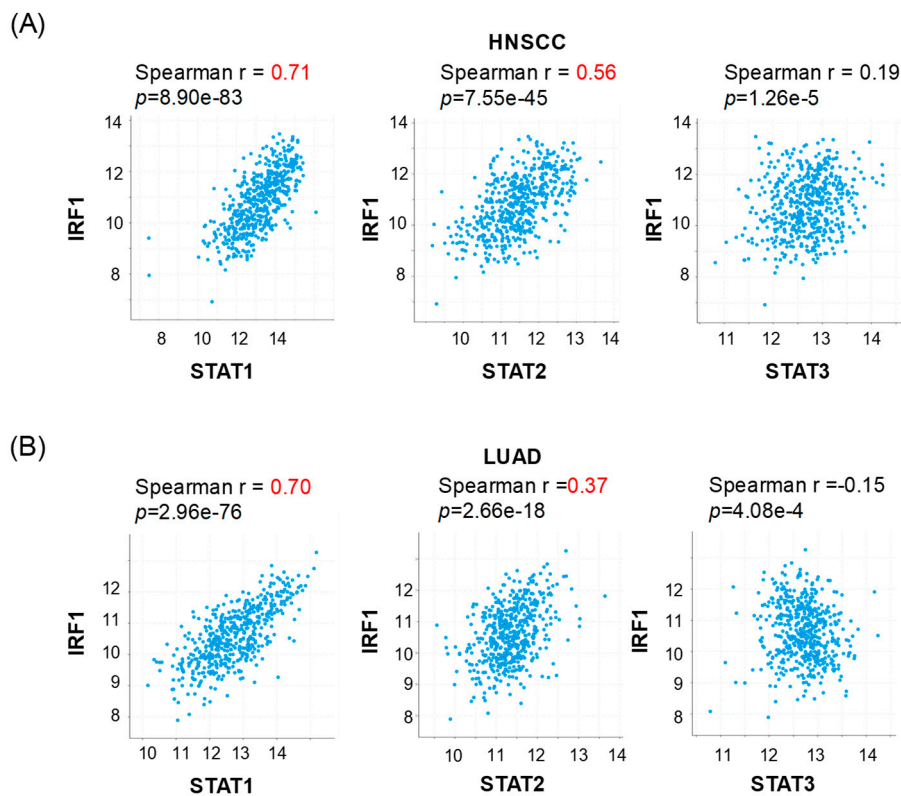

**Figure S2.** Correlation between IRF1 and STAT1 or STAT3 mRNA expression in HNSCC and LUAD from TCGA.

(A, B) Correlations between IRF1 and STAT1, STAT2, or STAT3 mRNA expression in HNSCC and LUAD cohorts from TCGA were analyzed through cBioportal for Cancer Genomics. (A) TCGA HNSCC Firehose Legacy 528 patients / 530 samples, (B) TCGA LUAD Firehose Legacy 584 patients / 586 samples.
